# Supplementary material
Source: PubMed Central journal article supplement (PMC6063773)

## Supplementary Figure Legends and Supplementary Figures

|                              |                                                                                           |
|------------------------------|-------------------------------------------------------------------------------------------|
| <b>Article Title:</b>        | Cell-specific histone modification maps link schizophrenia risk to the neuronal epigenome |
| <b>Corresponding Author:</b> | Schahram Akbarian<br>Panos Roussos<br>Gabriel Hoffman                                     |
| <b>Manuscript #:</b>         | NN-RS60953C                                                                               |

| <b>Supplementary Item &amp; Number</b> | <b>Title or Caption</b>                                                                                                                        |
|----------------------------------------|------------------------------------------------------------------------------------------------------------------------------------------------|
| Supplementary Figure 1                 | <b>Quality control parameters</b>                                                                                                              |
| Supplementary Figure 2                 | <b>Cell type and homogenate ChIP-seq data pipeline</b>                                                                                         |
| Supplementary Figure 3                 | <b>Contribution of peak regions from every sample to consolidated dataset peak regions.</b>                                                    |
| Supplementary Figure 4                 | <b>Similarity of cell type and homogenate data sets with Roadmap Epigenomics Project (REP) homogenates.</b>                                    |
| Supplementary Figure 5                 | <b>Visualization of cell and tissue specificity in neuronal, non-neuronal and homogenate chromatin</b>                                         |
| Supplementary Figure 6                 | <b>Cell composition analyses.</b>                                                                                                              |
| Supplementary Figure 7                 | <b>Visualization ChIP-Seq data for representative neuronal and non-neuronal genes</b>                                                          |
| Supplementary Figure 8                 | <b>QTL enrichments</b>                                                                                                                         |
| Supplementary Figure 9                 | <b>Enrichment of heritability for brain and non-brain related phenotypes within non-overlapping regions of cell type and homogenate peaks.</b> |
| Supplementary Figure 10                | <b>Coefficients of enrichments of heritability for schizophrenia within cell- and tissue-specific histone peaks</b>                            |
| Supplementary Figure 11                | <b>Principal components analysis of cell type and homogenate datasets</b>                                                                      |
| Supplementary Figure 12                | <b>Cell specific hQTLs and hQTLs overlap with GWAS</b>                                                                                         |
| Supplementary Figure 13                | <b>Functional enrichments for genes near significant hQTLs</b>                                                                                 |
| Supplementary Figure 14                | <b>Differential modification analysis</b>                                                                                                      |
| Supplementary Figure 15                | <b>Differential modification analysis: Brain region specific</b>                                                                               |
| Supplementary Figure 16                | <b>Functional annotation of cell specific and brain region specific peaks.</b>                                                                 |
| Supplementary Figure 17                | <b>Data integration of neuronal and non-neuronal ChIP-Seq peaks (PFC and ACC) with transcription start sites and gene expression</b>           |
| Supplementary Figure S18               | <b>ChIP-PCR quality controls</b>                                                                                                               |
| Supplementary Figure S19               | <b>Gating for Fluorescence-activated cell sorter (FACS) collecting immunotagged NeuN+ and NeuN- nuclei</b>                                     |

## SUPPLEMENTARY FIGURES LEGENDS

**Figure S1: Quality control parameters.** (A) Sequencing depth of n=17 and 19 individuals for celltype and homogenate data sets respectively. (B) Fragment lengths using SPP (see methods.) (C) Normalized strand coefficient obtained from SPP output file. All QC parameters have been group by data types: ACC neuronal, PFC neuronal, ACC neuron-depleted, PFC neuron-depleted and PFC HBCC homogenate for H3K4me3 and H3K27ac marks. (D) Irreproducible discovery rate (IDR) for PeakSeq(blue), SPP(green) and MACS2(orange) peak callers for peaks called on 3 random samples of consolidated PFC neuronal data set.

**Figure S2: Cell type and homogenate ChIP-seq data pipeline.** Mapping and QC: Flowchart demonstrating the QC of raw ChIP-Seq FASTQ files and consolidating the QCed files. Peak calling methods comparison: Steps to determine the best peak caller on consolidated datasets. Peak calling: Steps to call peaks on consolidated data sets. Quantification and covariates analysis: Quantifying the reads counts in determined peak regions and decomposing the contribution of the multiple sources of variations in the combined dataset. Differential modification and pathway analysis: Steps to determine the peak regions that have significant  $\log_2$  fold-change in different cell types and brain regions.

**Figure S3: Contribution of peak regions from every sample to consolidated dataset peak regions.** (A,C) No. of peaks with  $\log_2\text{cpm} > 1$  that are present in at least 'n' individuals (n=17 for cell type and 11 for homogenate datasets).(B,D) Bar plot of no of peaks ( $\log_2\text{cpm} > 1$ ) of each sample that are contributing to consolidated datasets peaks.

**Figure S4: Similarity of cell type and homogenate data sets with Roadmap Epigenomics Project (REP) homogenates.** (top)

Box plots illustrates measured similarity (Jaccard index) of peak regions of 5 consolidated data sets (PFC neuronal; n=17(17), ACC neuronal; n=14(17), PFC neuron-depleted; n=17(17), ACC neuron-depleted n=15(15) and PFC tissue; n=11(17) from each mark H3K4me3(H3K27ac)) to 10(7) brain tissues in red and 107(84) non-brain tissues in grey from the Roadmap Epigenomics Project<sup>5</sup> for H3K4me3 (H3K27ac.) Box plots' black horizontal line correspond to the median value of jaccard

index values of our datasets with REP brain tissues and REP non-brain tissues respectively. The vertical line above and below box shows the 1.5IQR of upper quartile and 1.5IQR of lower quartile of jaccard index with REP tissues for a given dataset. Tissues with jaccard index values exceeding the 1.5IQR are shown as black dots. (bottom) Jaccard indices for the 5 consolidated H3K27ac data sets (PFC neuronal; n=17, ACC neuronal; n=17, PFC neuron-depleted; n=17, ACC neuron-depleted n=15 and PFC tissue; n=17) to (left) Sun et al.<sup>10</sup> H3K27ac from cortical homogenates and (right) Ng et al.,<sup>11</sup> H3K9ac from cortical homogenates.

**Figure S5: Visualization of cell and tissue specificity in neuronal, non-neuronal and homogenate chromatin.** PCA of pairwise correlations between each pair of ChIP-Seq experiments based on log<sub>2</sub> cpm matrix from each mark. **(A)** Visualization of first two principal components where each data point is colored by cell type: neuronal chromatin in blue n=31(34) independent samples of neuron-depleted chromatin, n=32(32) independent samples in golden depicting the cell type and tissue n=11(17) independent samples in black **(B)** brain region: PFC in pink, n=45(51) independent samples and ACC in green, n=29(32) independent samples with no clear clustering for H3K4me3(H3K27ac) in left(right) panels.

**Figure S6: Cell composition analyses.** Scatter plot of estimated NeuN<sup>+</sup> fraction and first principal component (PC1) of histone ChIP-seq from sorted NeuN<sup>+</sup> and NeuN<sup>-</sup> nuclei and homogenate samples. These fractions were obtained using R library “cellmix” which uses Non-negative matrix factorization on RPKM matrix (rows are identified ChIP-seq genomic regions and columns are samples) and our neuronal and neuron-depleted chromatin signatures as basis set. PCA was done on pairwise correlations between each pair of ChIP-Seq samples (H3K4me3, our NeuN<sup>+</sup> and NeuN<sup>-</sup> nuclei and homogenate datasets (N=74), REP(N=2); H3K27ac, our NeuN<sup>+</sup> and NeuN<sup>-</sup> nuclei and homogenate datasets (N=83), REP(N=2) and Sun et.al (N=53) samples) based on log<sub>2</sub> cpm matrix from each mark. We show PC1 vs NeuN<sup>-</sup> fraction for all samples: NeuN<sup>+</sup> in blue, NeuN<sup>-</sup> in golden, HBCC cortical tissue homogenate in black, Roadmap Epigenomics Project (REP) cortical tissue homogenate<sup>5</sup> in red, Sun et.al.<sup>10</sup> cortical homogenate in orange.

**Figure S7: Visualization ChIP-Seq data for representative neuronal and non-neuronal genes. (A-B)** Visualization of genome coverage of PFC neuronal, n=17(17) and PFC non-neuronal, n=17(17) data

sets (one dataset per brain) for neuronal gene: CAMK2A (A) and (B) non-neuronal gene OLIG1 from H3K4me3(H3K27ac) mark shown in upper track and bottom track respectively ; results shown are representative for 17/17 brains.

**Figure S8: QTL enrichments.** Fold enrichment of H3K27ac (left) and H3K9ac QTL's (right) identified in PFC homogenates and peaks called on neuronal (blue) and non-neuronal (golden) cell type consolidated datasets and differentially modified peaks labeled as "DiffBind neurons" (blue) and "DiffBind non-neurons" (golden) for (A) H3K27ac and (B) H3K4me3, respectively. Each bar shows a single value (the enrichment score) and its standard error. H3K4me3, N (brains) = 17 PFC NeuN<sup>+</sup>, 17 PFC NeuN<sup>-</sup>, 11 PFC tissue homogenate, and H3K27ac N (brains) = 17 PFC NeuN<sup>+</sup>, 17 PFC NeuN<sup>-</sup>, 17 PFC tissue homogenate.

**Figure S9: Enrichment of heritability for brain and non-brain related phenotypes within non-overlapping regions of cell type and homogenate peaks.** Heatmap of  $-\log_{10}$ Pvalue of enrichment from LD-score regression to partitioned heritability to test the genetic variants contributing to 18 brain and non-brain-related phenotypes were enriched for non-overlapping regions of PFC and ACC neuronal (blue) in block 1,2 and PFC and ACC neuron-depleted (golden) with PFC tissue homogenate '1' dataset of present study, '2' REP Roadmap Epigenomics Project and '3' dataset from ref.<sup>10</sup> (only for H3K27ac); and vice-versa in block 3 and 4 for H3K4me3 (A) and H3K27ac (B).

**Figure S10: Coefficients of enrichments of heritability for schizophrenia within cell- and tissue-specific histone peaks.** Bar plot of coefficient of LD-score regression for PFC NeuN<sup>+</sup>, ACC NeuN<sup>+</sup> in blue and PFC NeuN<sup>-</sup>, ACC NeuN<sup>-</sup> in gold, and ACC and PFC bulk tissue (homogenate) including our HBCC samples and Roadmap Epigenomics Project (REP)<sup>5</sup> and Sun et.al.<sup>10</sup> data for (A) H3K4me3 and (B) H3K27ac. Each bar shows a single value (the single LD score coefficient) and its standard error. H3K4me3, N (brains) = 17 PFC NeuN<sup>+</sup>, 14 ACC NeuN<sup>+</sup>, 17 PFC NeuN<sup>-</sup>, 15 ACC NeuN<sup>-</sup>, and 11 PFC tissue homogenate; H3K27ac. N (brains) = 17 PFC NeuN<sup>+</sup>, 17 ACC NeuN<sup>+</sup>, 17 PFC NeuN<sup>-</sup>, 15 ACC NeuN<sup>-</sup>, 17 PFC tissue homogenate (HBCC).

**Figure S11: Principal components analysis of cell type and homogenate datasets.** PCA of pairwise correlations between each pair of ChIP-Seq experiments based on log<sub>2</sub> cpm matrix of all genomic

regions and matrix with excluding the columns for peak regions from sex chromosomes (chrX and chrY). **(A)** from H3K4me3 mark **(B)** from H3K27ac mark. Right panel of (A,B) show PC1 and PC4 where each data point is colored by cell type: neuronal in blue, neuron-depleted in golden and homogenates in black. Left panel in **(A)** shows clustering of these points by sex, colored as females in orange and males in light blue where clustering by sex disappears after removal of sex chromosomal peak regions. H3K4me3 (H3K27ac) n=31(34) independent samples of neuron-depleted chromatin, n=32(32) independent samples in golden depicting the cell type and tissue n=11(17) independent samples in black

**Figure S12: Cell specific hQTLs and hQTLs overlap with GWAS.** **A)** Number of significant hQTLs discovered in H3K4me3- (top row) and H3K27ac-tagged sequences (bottom row) in PFC NeuN<sup>+</sup>, ACC NeuN<sup>+</sup>, PFC NeuN<sup>-</sup>, ACC NeuN<sup>-</sup> and PFC homogenate samples. Sample sizes (N) provided in parenthesis. **B)** hQTLs-GWAS overlap: Number of significant loci (from PGC SCZ GWAS) overlapping with cell and tissue specific hQTLs (qvalue < .05) for every dataset:- PFC NeuN<sup>+</sup>, ACC NeuN<sup>+</sup>, PFC NeuN<sup>-</sup>, ACC NeuN<sup>-</sup> and PFC HBCC tissue homogenate for both histone marks. Number of loci were determined by evaluating the overlap of GWAS –SCZ lead SNP with SNPs in LD ( $R^2 > 0.8$ ) with hQTLs (qvalue < 0.05.)

**Figure S13: Functional enrichments for genes near significant H3K27ac hQTLs.** Bar plots of functional enrichments computed using GREAT of significant PFC neuronal, ACC neuronal, PFC neuronal, PFC neuron-depleted ('non-neurons'), ACC neuron-depleted ('non-neurons) and PFC homogenate hQTLs (RASQUAL q value < 0.05) depicting top 20 pathways for GO Biological process with  $-\log_{10}$  p-value. N (brains) = 17 PFC NeuN<sup>+</sup>, 17 ACC NeuN<sup>+</sup>, 17 PFC NeuN<sup>-</sup>, 15 ACC NeuN<sup>-</sup>, 17 PFC tissue homogenate (HBCC).

**Figure S14: Differential modification analysis. (A-B)** Volcano plot showing the distribution of  $-\log_{10}$ p-value and  $\log_2$ fold-change obtained from differential modification analysis **A)** Cell Specific: peaks in blue and golden are enriched in neuronal and neuron-depleted chromatin, respectively. Non-significant regions are shown in black for H3K4me3 and H3K27ac marks. Bottom panel shows the distribution of  $\log_2$ fold-change of these enriched regions for both marks. **B)** Brain region

specific: peaks in green and pink show enrichment for ACC and PFC respectively in neuronal cell type data for H3K4me3 (H3K27ac) marks. Bottom panel show the distribution of  $\log_2$  fold-change of these enriched regions for both marks. H3K4me3 N (brains) = 17 PFC NeuN<sup>+</sup>, 14 ACC NeuN<sup>+</sup>, 17 PFC NeuN<sup>-</sup>, 15 ACC NeuN<sup>-</sup>, and 11 PFC tissue homogenate; H3K27ac N (brains) = 17 PFC NeuN<sup>+</sup>, 17 ACC NeuN<sup>+</sup>, 17 PFC NeuN<sup>-</sup>, 15 ACC NeuN<sup>-</sup>, 17 PFC tissue homogenate (HBCC).

**Figure S15: Differential modification analysis: Brain region specific** (A) Counts of brain region specific peaks in neuronal cells for H3K4me3 and H3K27ac. Differentially histone modification analysis was performed on the normalized read counts matrix with columns as genomic regions 128,467 (147,539) and 4 types of samples PFC neuronal, ACC neuronal, PFC neuron-depleted and PFC neuron-depleted from 17 individuals as rows 63 (66) after QC for H3K4me3 (H3K27ac.) In the brain region analysis, the largest effect is found in the H3K27ac - neuronal comparison. (B) Examining the Cell Type specificity of identified Brain Region specific peaks. Distribution of  $\log_2$  fold change of region specific peaks in blue and gold are neuronal and non-neuronal cell types respectively. This plot depicts the presence of non-neuronal peak regions in PFC neuronal, ACC neuronal region specific peaks. (C) Correlation plot of  $\log_2$ FC of region specific peaks with  $\log_2$ FC from cell specific differential modification analysis. (D) Counts of brain region specific peaks in neuron-depleted chromatin for H3K4me3 and H3K27ac.

**Figure S16: Functional annotation of cell specific and brain region specific peaks.** Genomic feature distribution of ACC neuronal, PFC neuronal, ACC neuron-depleted, PFC neuron-depleted and PFC HBCC homogenate. Distribution was evaluated across seven distinct categories: promoter, intron, exons, 3' UTR, 5'UTR, and two types of intergenic sequences:  $\leq 3$ Kb and  $>3$ kb ('distal') from nearest gene body plus minimum of 5Kb distance from nearest TSS.

**Figure S17: Data integration of neuronal and non-neuronal ChIP-Seq peaks (PFC and ACC) with transcription start sites and gene expression.** Chip-Seq counts enrichment of (A) H3K4me3 and (B) H3K27ac within 15 Kb downstream and upstream of transcription start site (TSS) for genes in each of 5 sets sorted by expression level in post mortem brain homogenate from the CommonMind Consortium (see Methods).

**Figure S18: ChIP-PCR quality controls.** Bar graph (top) (N = 5, mean  $\pm$  SD) and (middle) qPCR signal traces, representative for 5/5 samples, showing the enrichment of H3K4me3 (left) and H3K27ac (right) in neuronal NeuN<sup>+</sup> nuclei fraction as compared to non-neuronal NeuN<sup>-</sup> nuclei for the neuronal gene *GRIN2B*, but not for negative control *HBB* beta-globin gene. Primer Sequence for *Grin2B*: forward: 5' - TCC TCT TCC ATT CAG GTT GG - 3'; reverse: 5' - GGC TAT ACC ATT CCT GGG ACA - 3'. Primer Sequence for *HBB*: forward: 5' - TCC CCA GGT AGT TCC CTT TT - 3'; reverse: 5' - TTC AAG GCC CTG TAG TTG CT - 3'. (Bottom) H3K4me3 and H3K27ac ChIPseq map tracks show signal from *GRIN2B* (neuronal mark), *GFAP* (astrocyte mark), and *HBB* (negative control) genes from both NeuN<sup>+</sup> and NeuN<sup>-</sup> nuclei. Notice the cell-type specificity for both histone marks.

**Figure S19: FACS gating.** Representative FACS gating panels for human cortical nuclei immunotagged with NeuN antibody. Gating parameters to maximize specificity of NeuN<sup>+</sup> sorting with complete separation from NeuN<sup>-</sup> population.

Figure S1

Neuronal Non-neuronal HBCC Homogenate

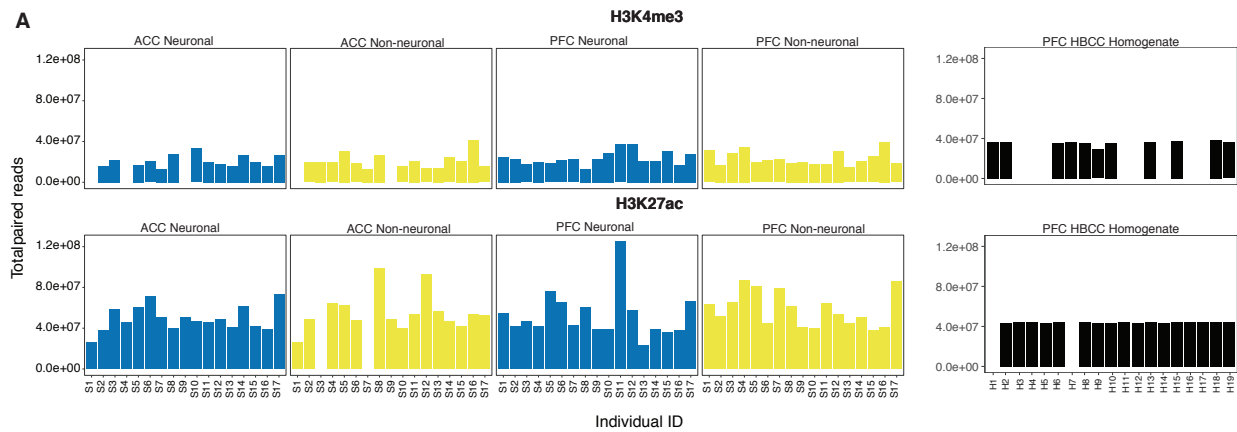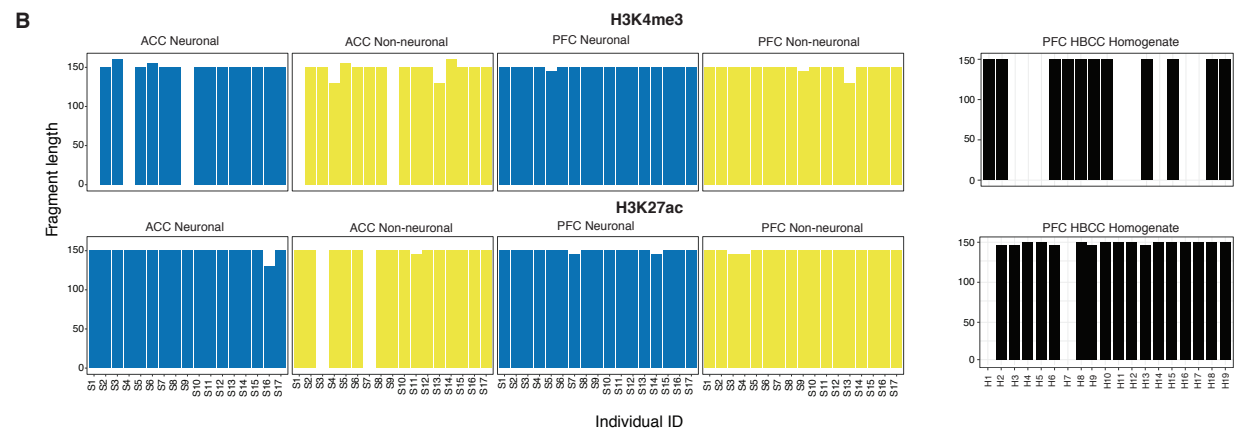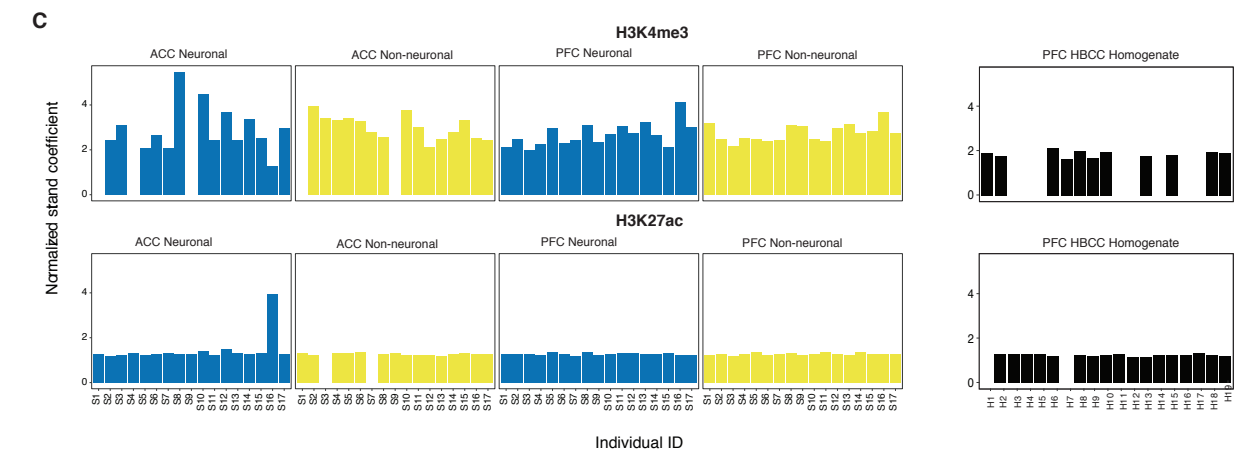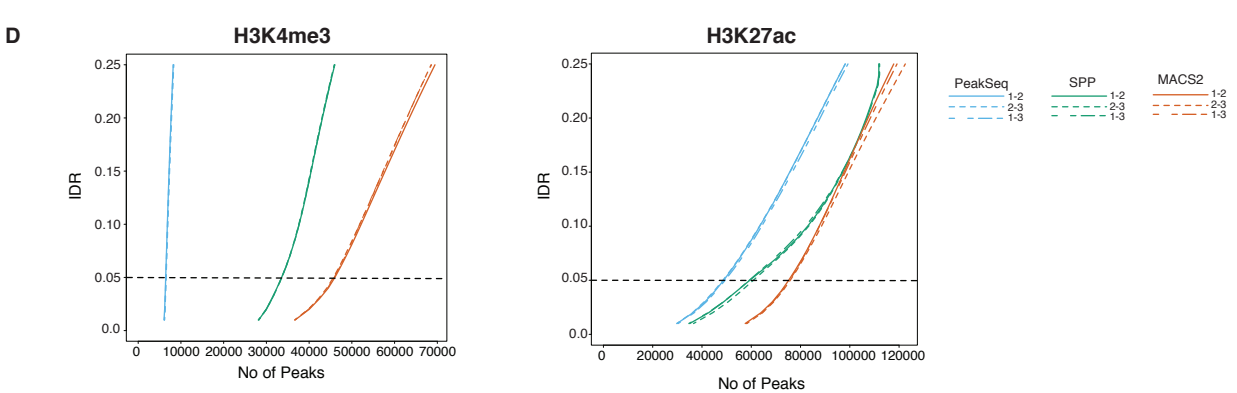

Figure S2

## Cell type and homogenate ChIP-Seq pipeline

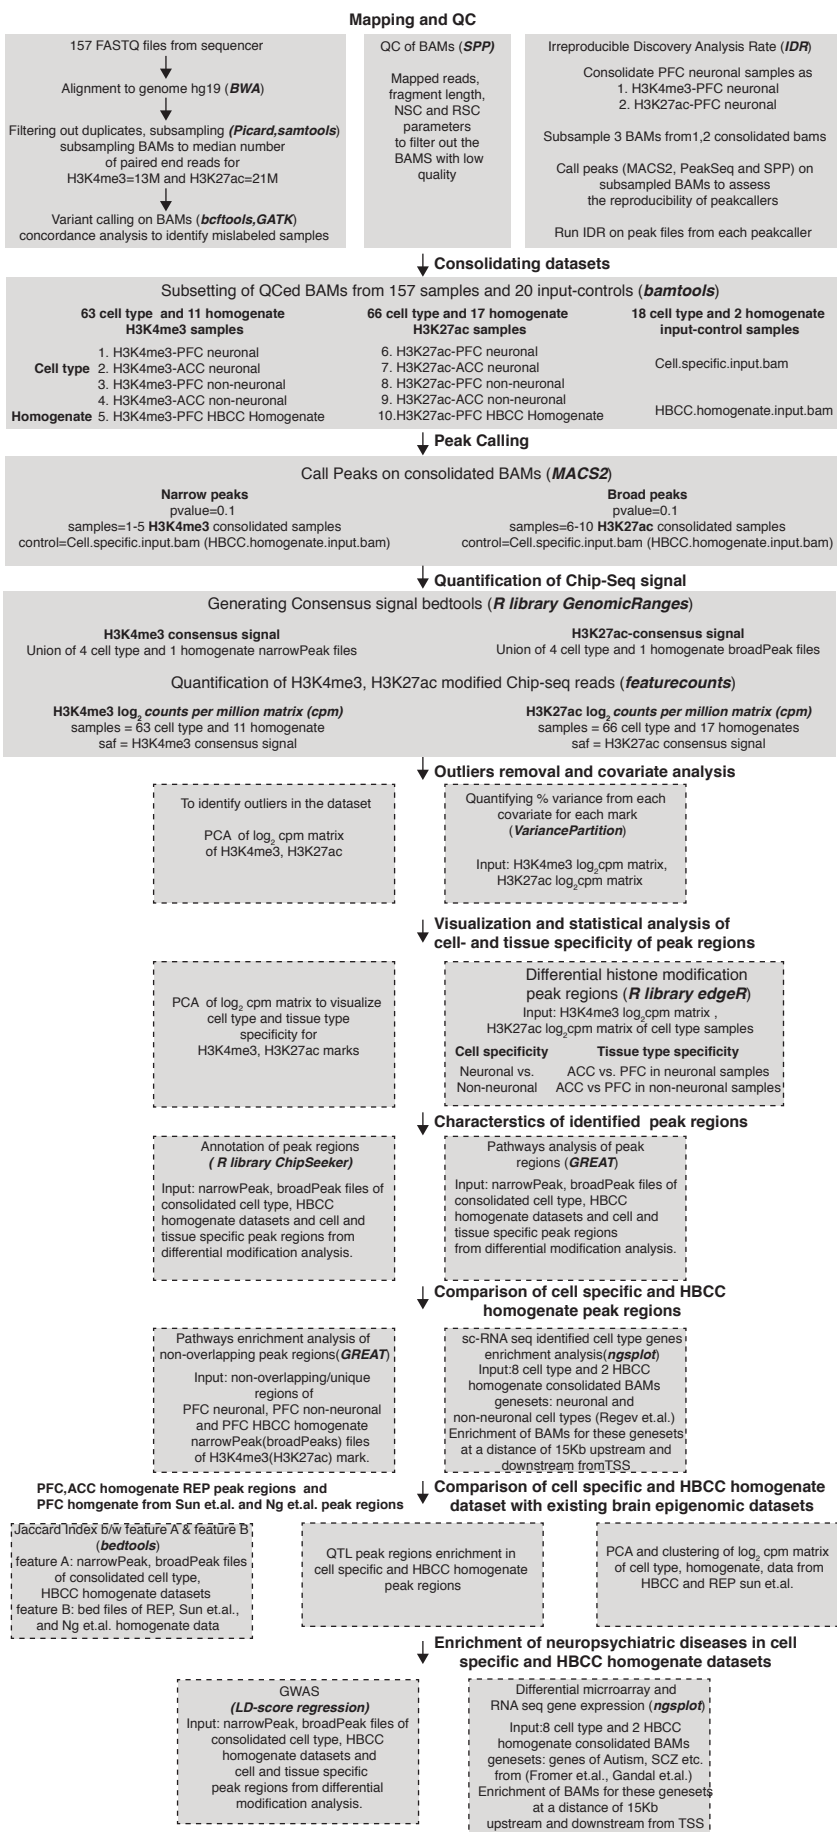

**A** Figure S3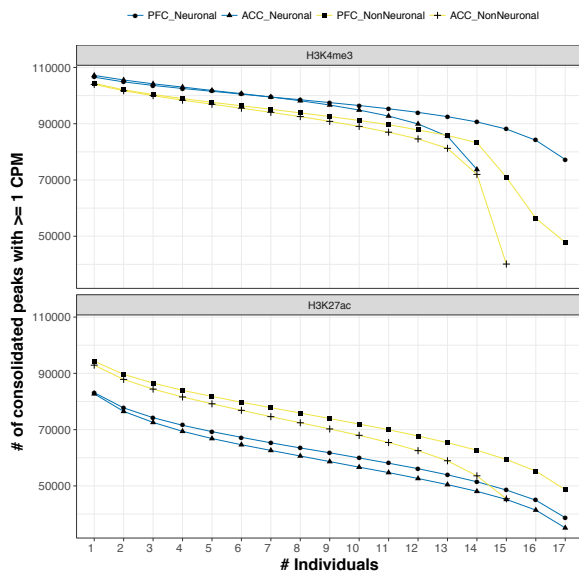**B**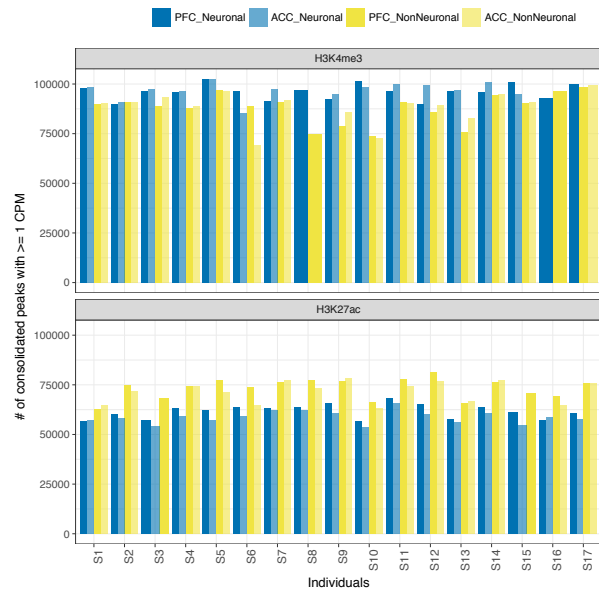**C**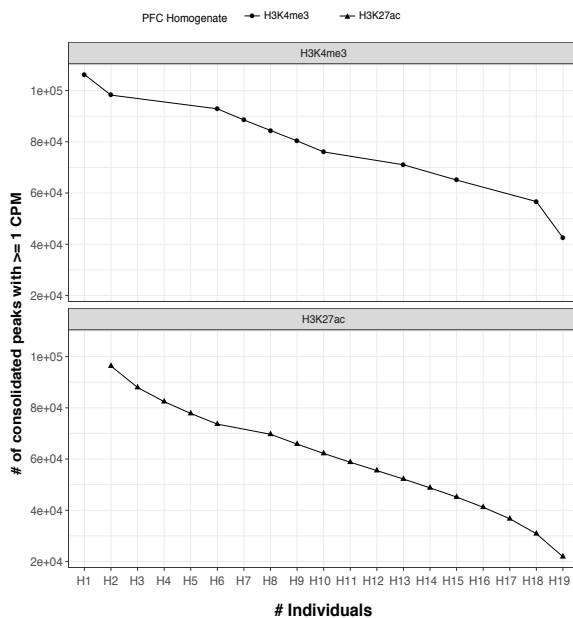**D**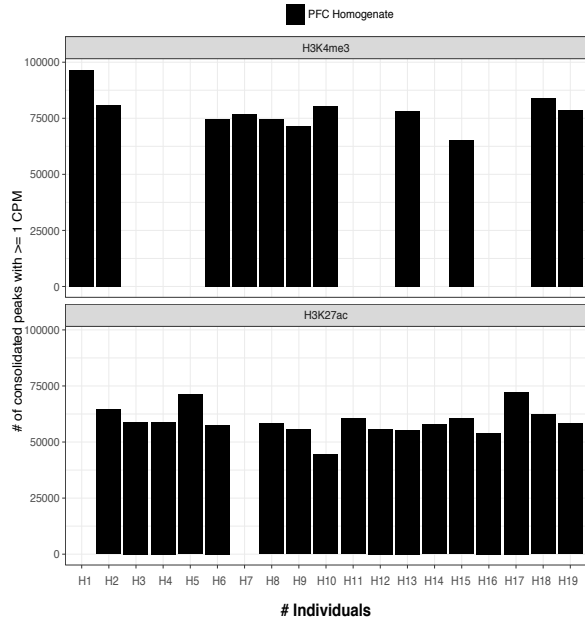

Figure S4

Roadmap  
Epigenomics Project

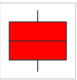

Brain

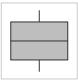

Non-Brain

H3K4me3

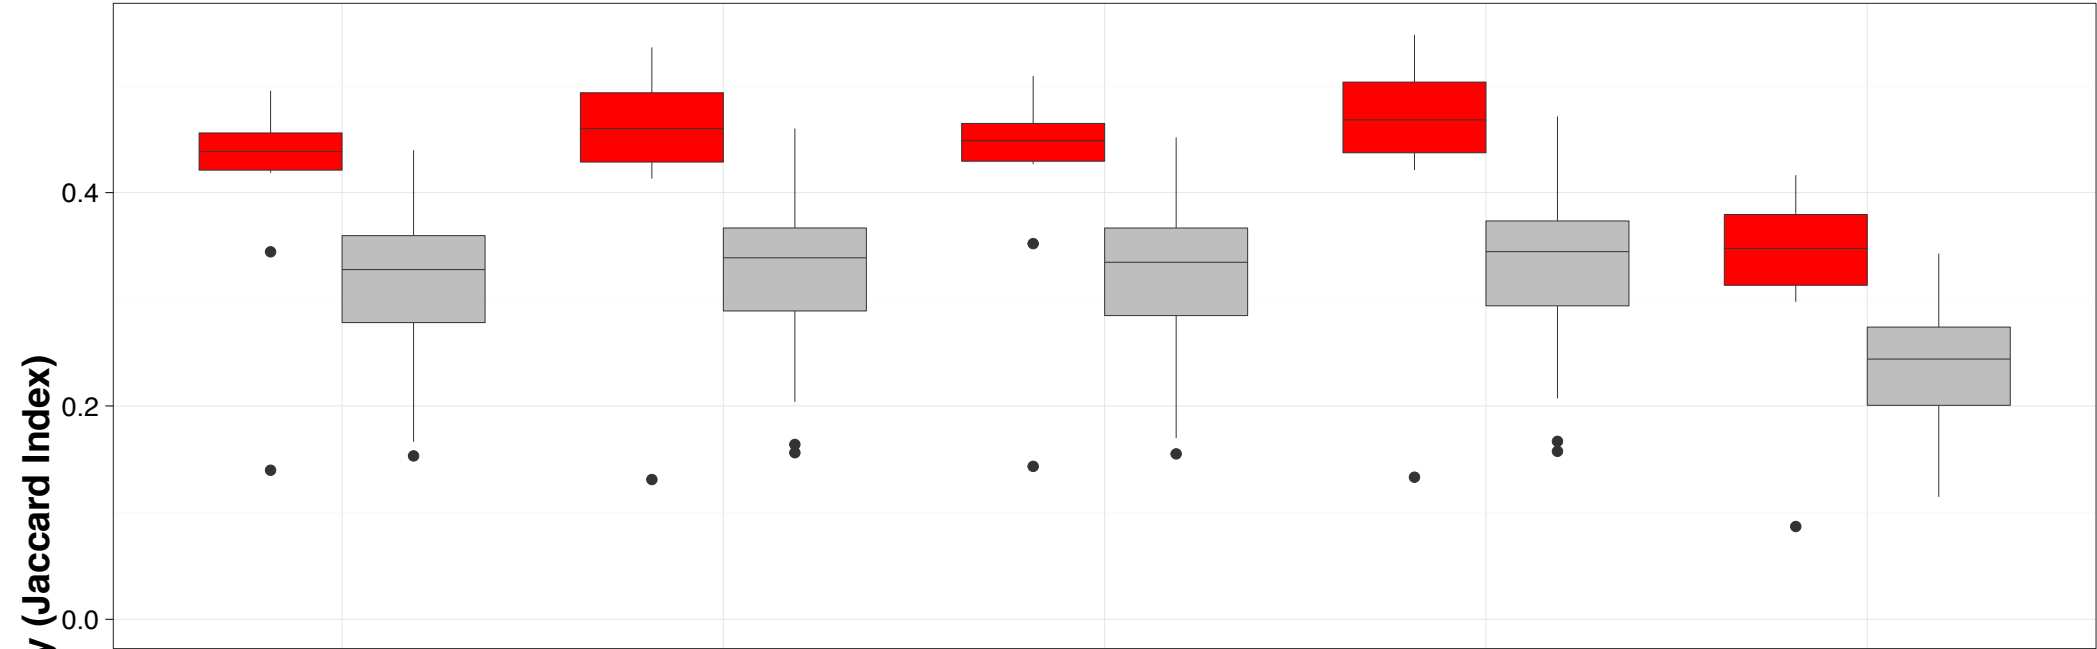

H3K27ac

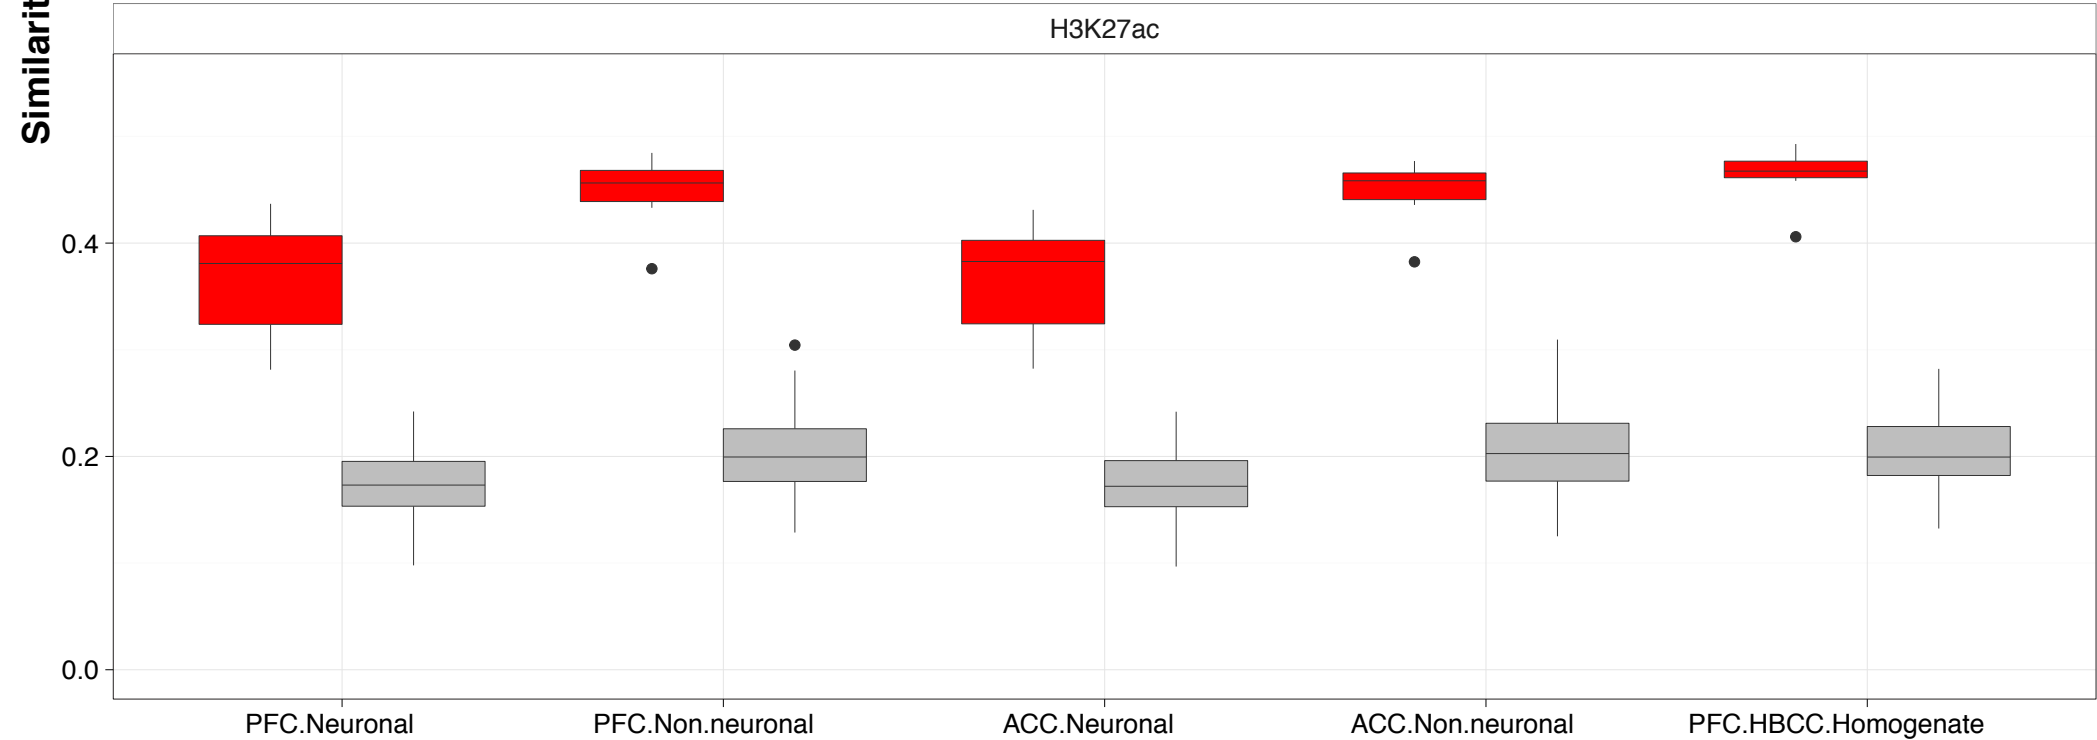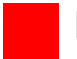

Brain

Sun et.al.  
H3K27ac

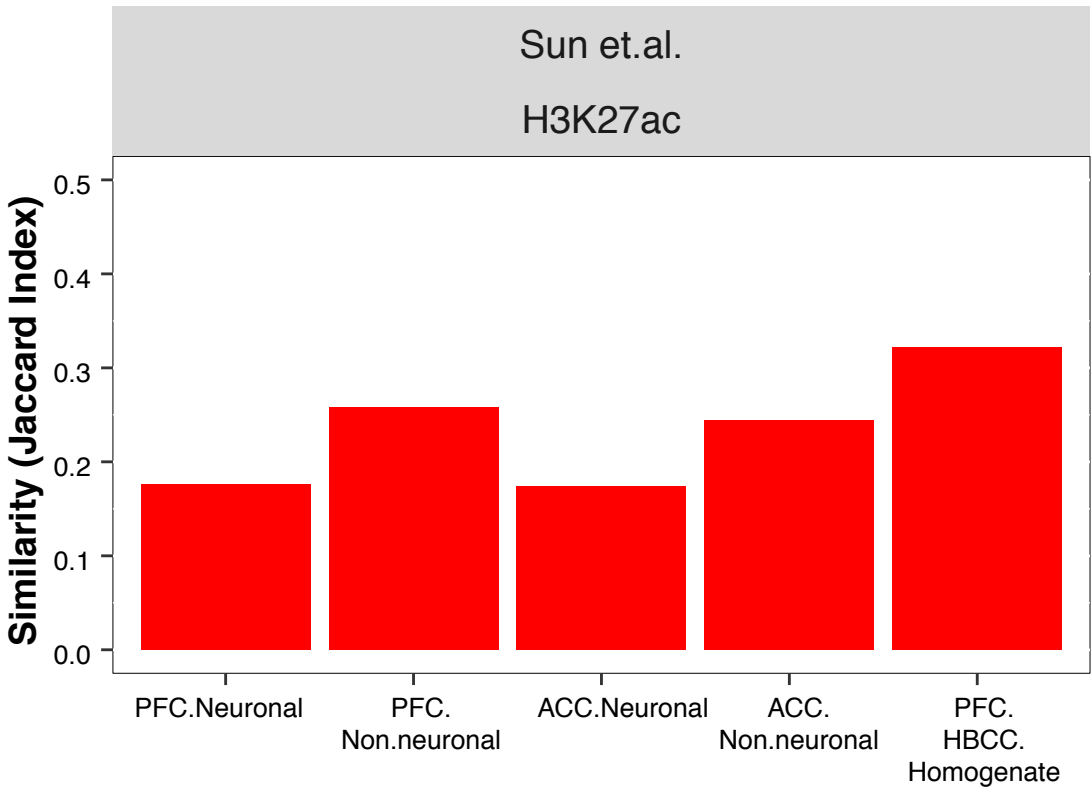

Ng et.al.  
H3K9ac

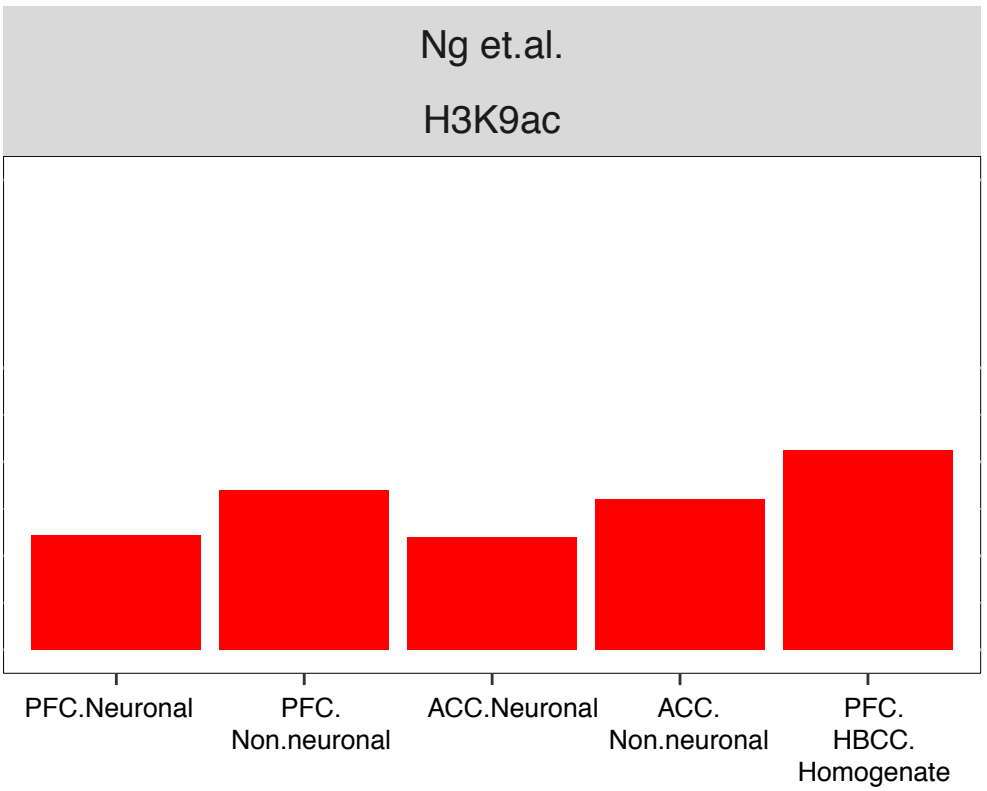

A

H3K4me3

Figure S5

H3K27ac

■ NeuN+ ■ NeuN- ● HBCC Homogenate

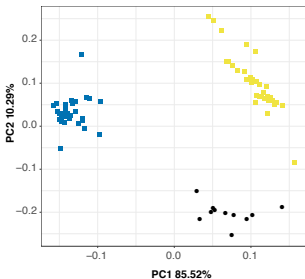

■ NeuN+ ■ NeuN- ● HBCC Homogenate

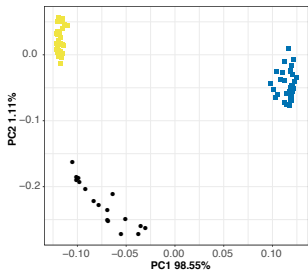

B

■ NeuN+ ■ NeuN- ● HBCC Homogenate ● ACC ● PFC

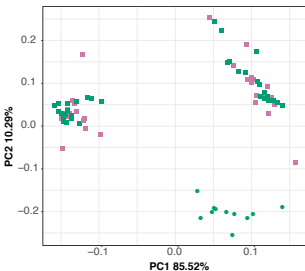

■ NeuN+ ■ NeuN- ● HBCC Homogenate ● ACC ● PFC

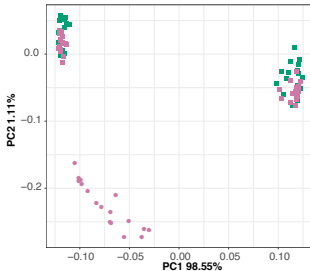

Figure S6

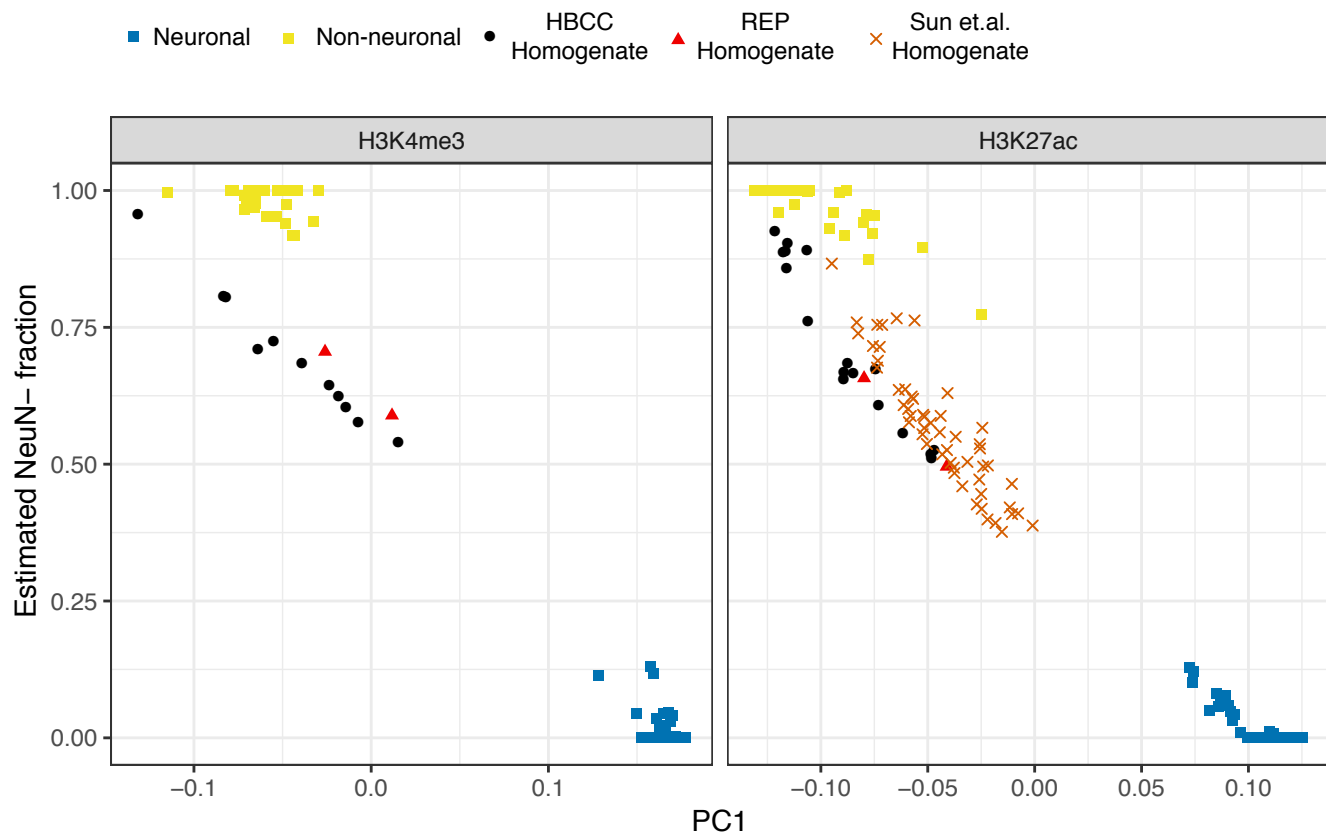

## ChIP-Seq Coverage track for genes CAMK2A and OLIG1

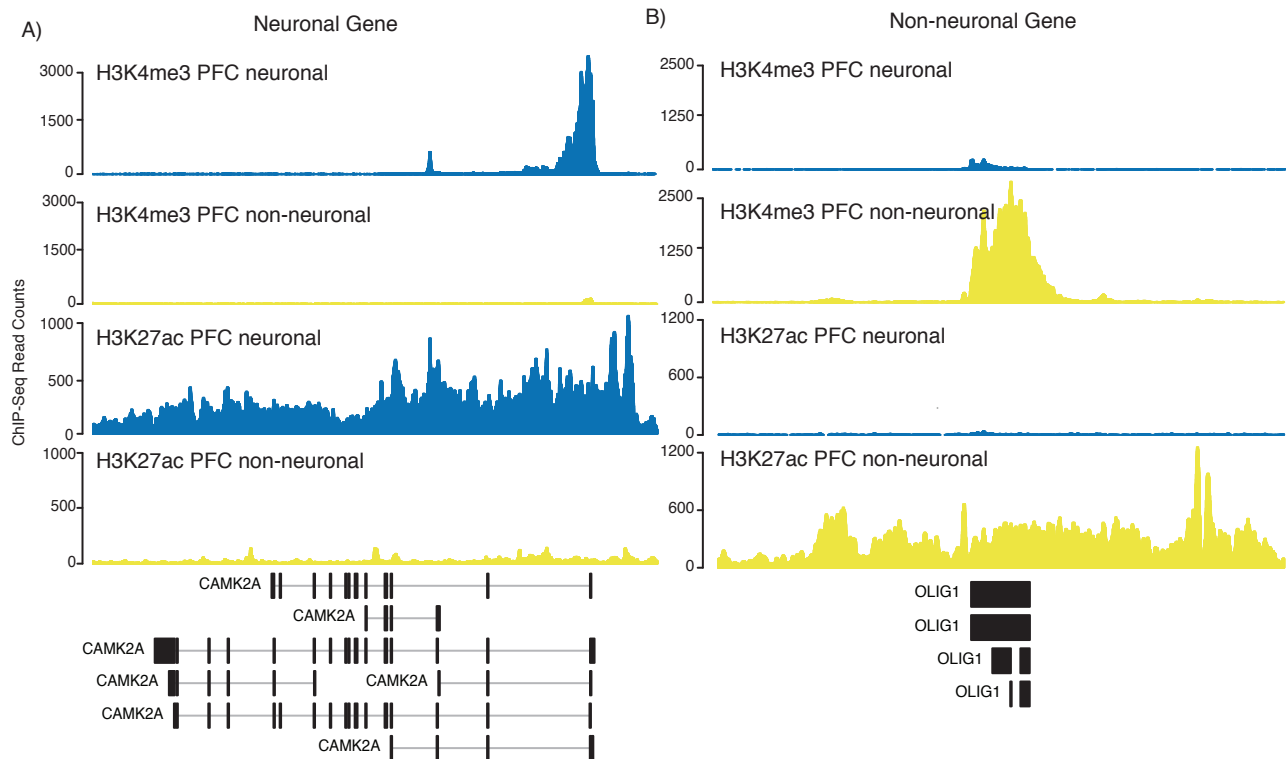

## Figure S8

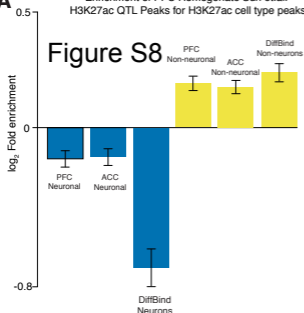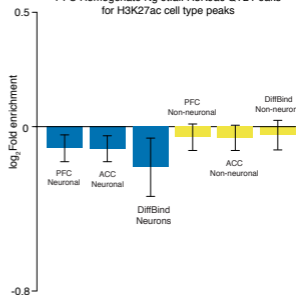

B

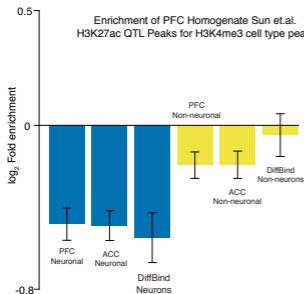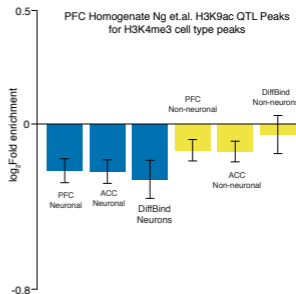

**B**

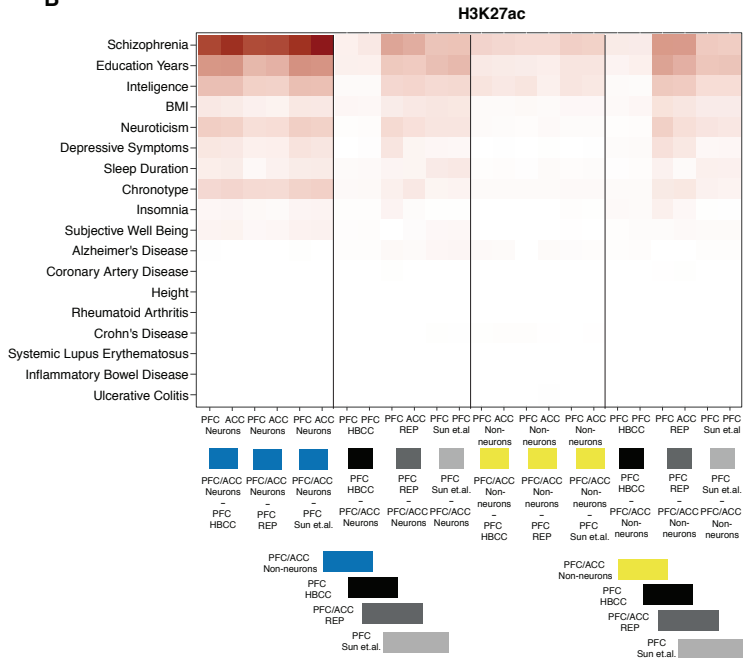

Figure S10

H3K4me3

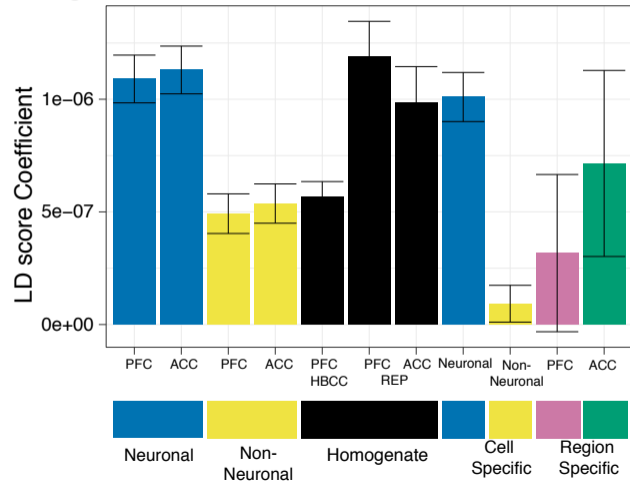

H3K27ac

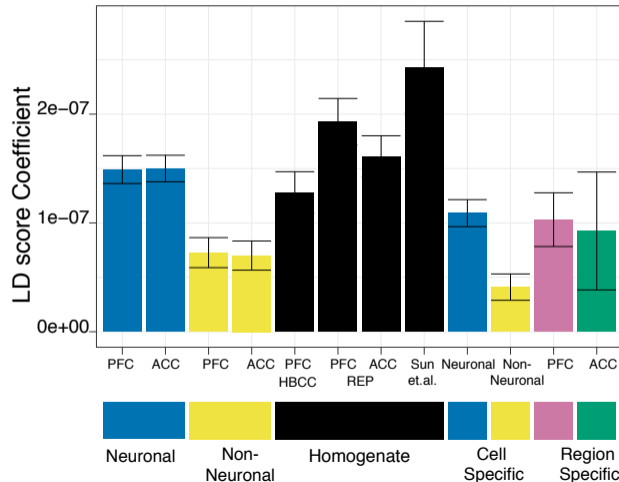

H3K9ac

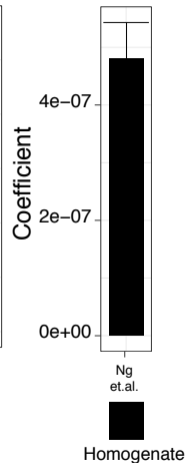

# A Figure S11

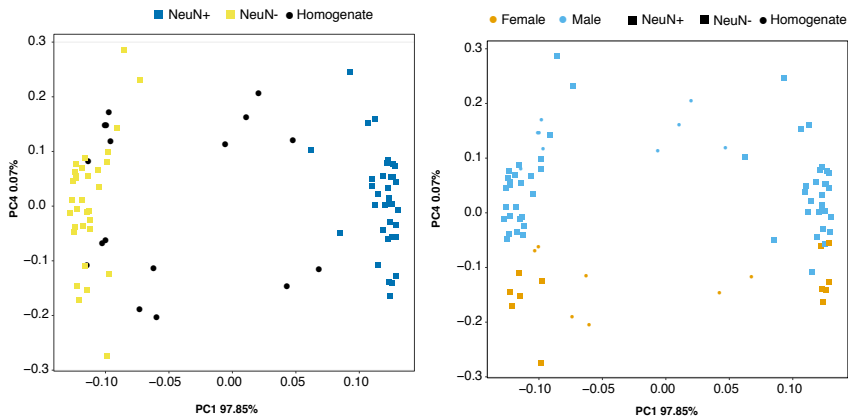

## B

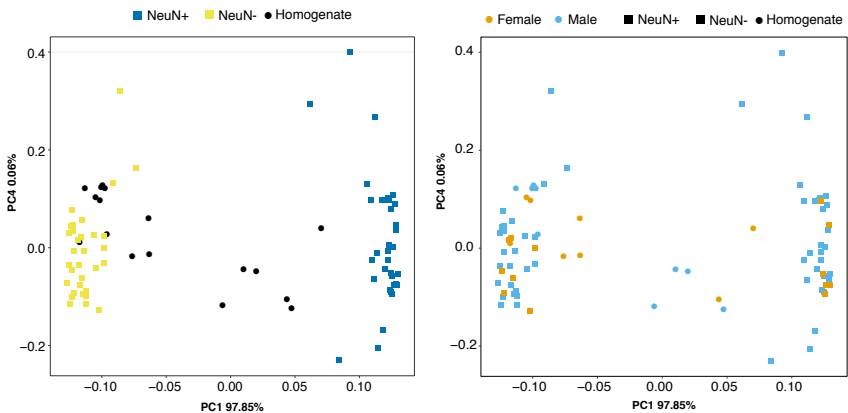

# A Figure S12

List of #peaks with significant hQTLs (q value < 0.05)

|         | PFC NeuN+ | PFC NeuN- | ACC NeuN+ | ACC NeuN- | PFC HBCC Homog |
|---------|-----------|-----------|-----------|-----------|----------------|
| H3K4me3 | 3412 (17) | 3517 (17) | 1565 (14) | 3084 (15) | 2077 (11)      |
| H3K27ac | 8042 (17) | 6695 (17) | 6731 (17) | 7751 (15) | 7207 (17)      |

\*() No of samples

# B

List of #loci PGC GWAS SCZ overlap with hQTLs (qvalue <=0.05)

|         | PFC NeuN+ | PFC NeuN- | ACC NeuN+ | ACC NeuN- | PFC HBCC Homog |
|---------|-----------|-----------|-----------|-----------|----------------|
| H3K4me3 | 8         | 8         | 3         | 8         | 2              |
| H3K27ac | 13        | 11        | 10        | 8         | 11             |

Figure S13

GREAT Functional enrichment of H3K27ac peaks with significant hQTLs from RASQUAL

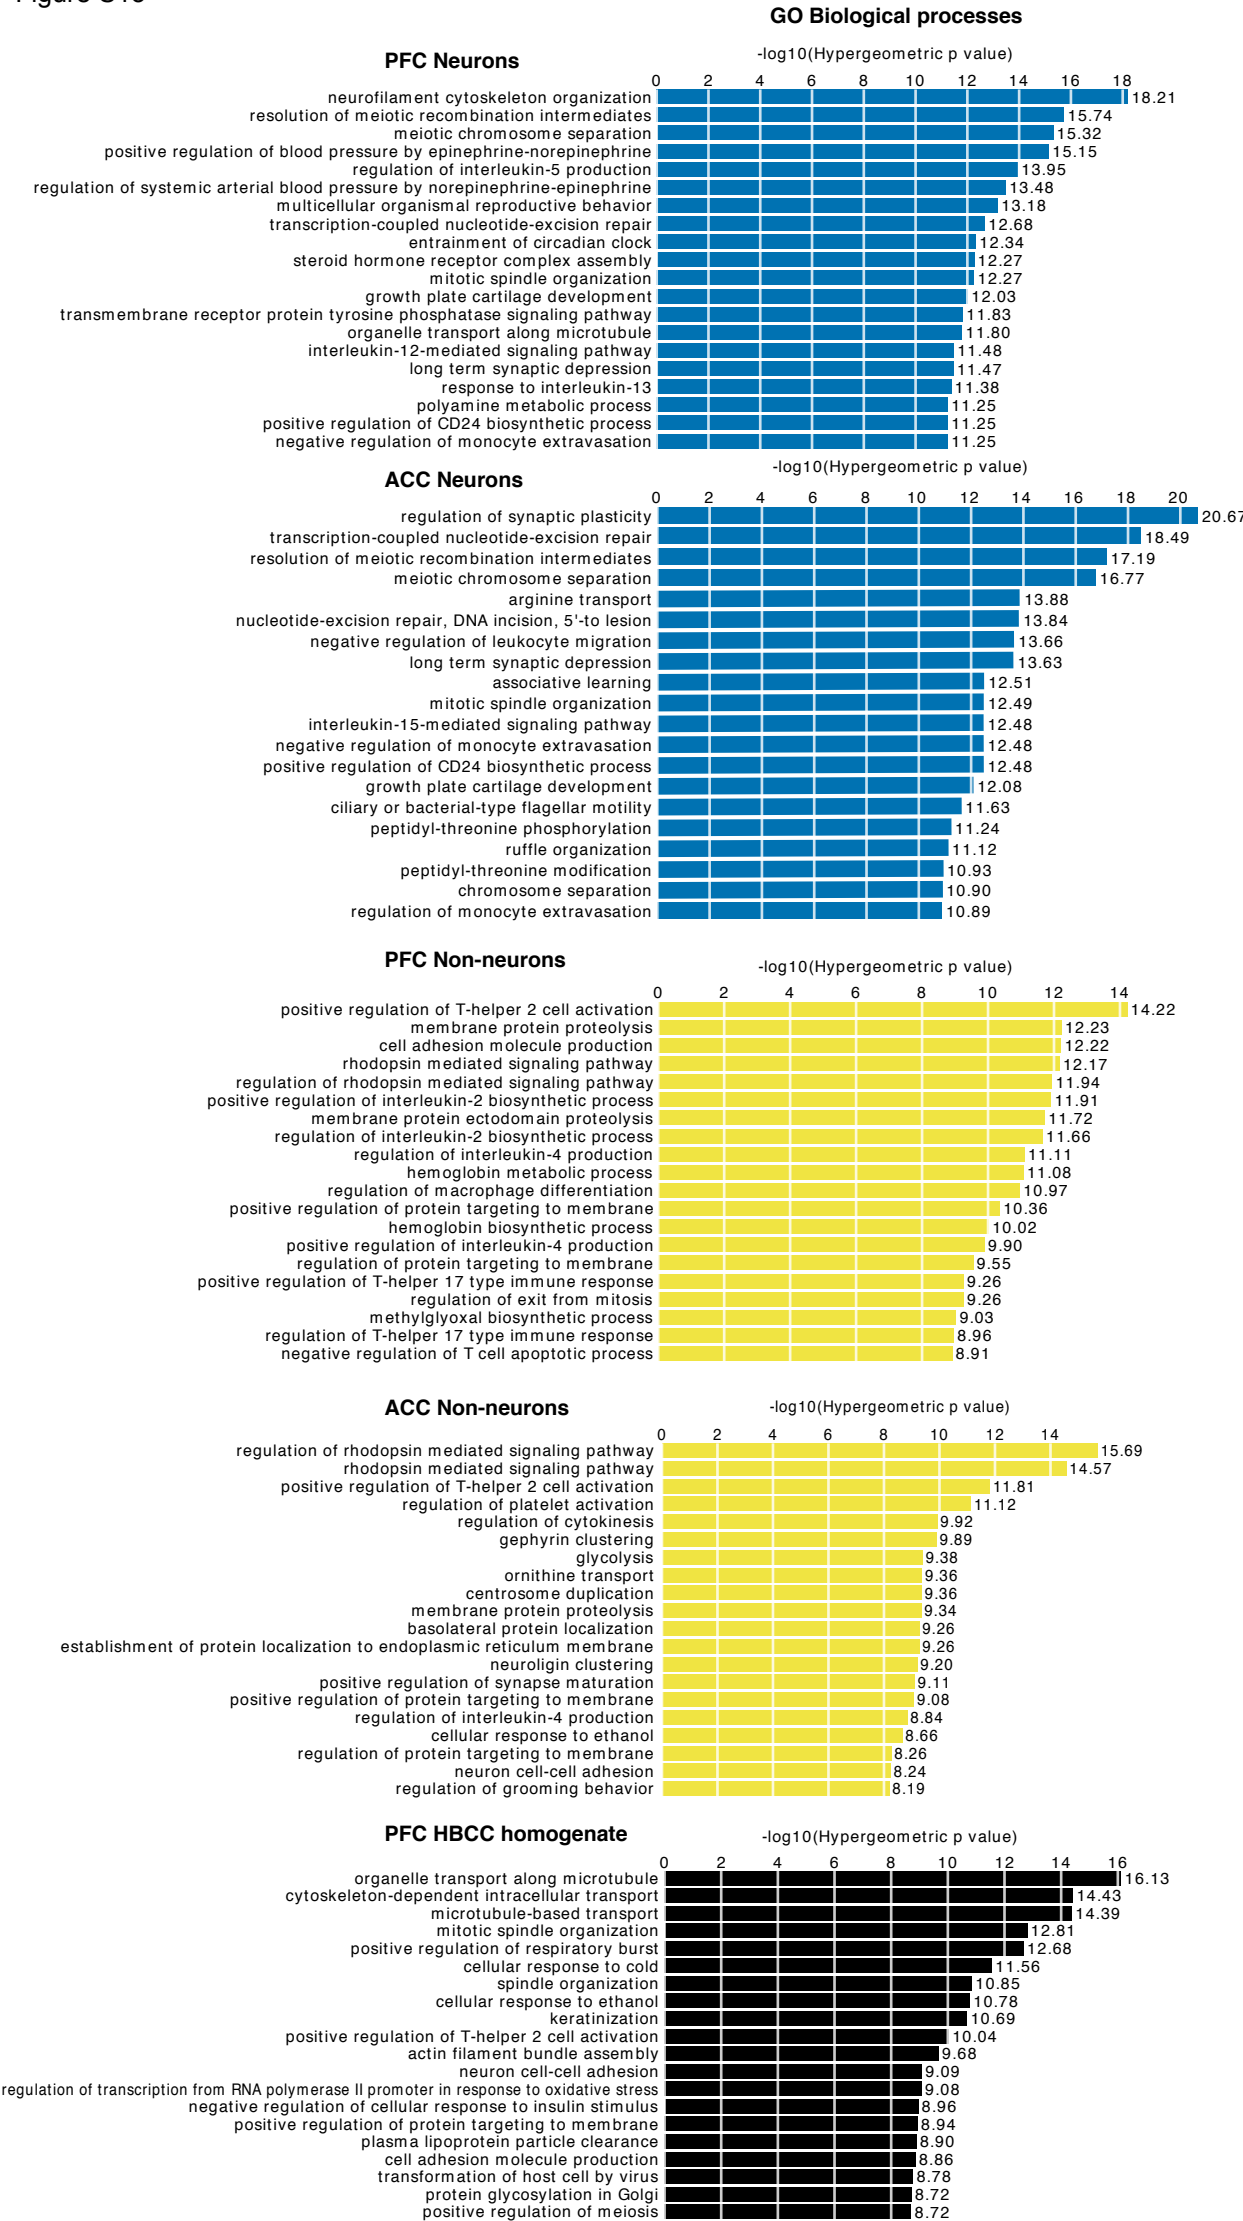

**A**

Cell Type differential modification analysis

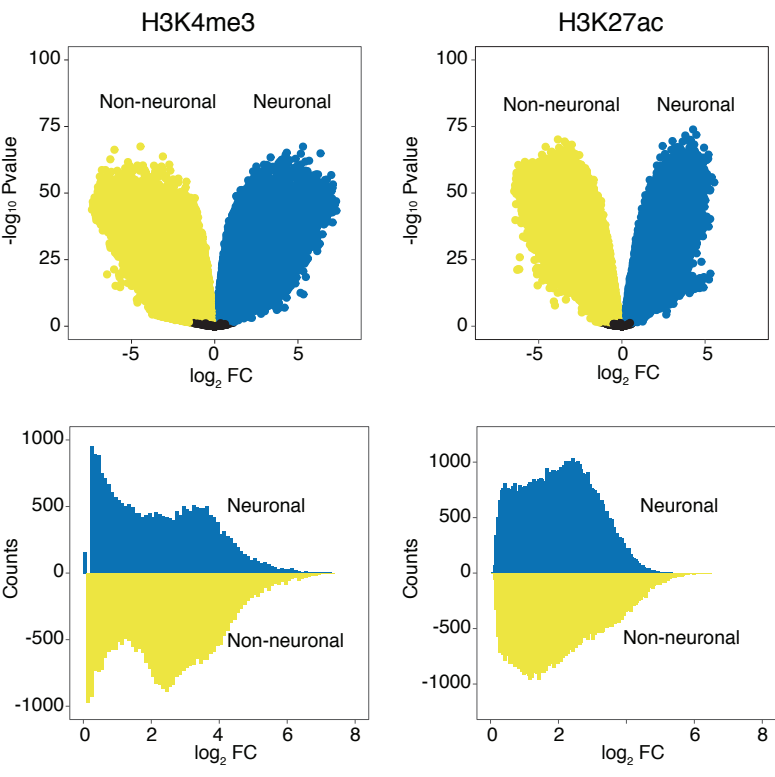

**B**

Brain Region differential modification analysis

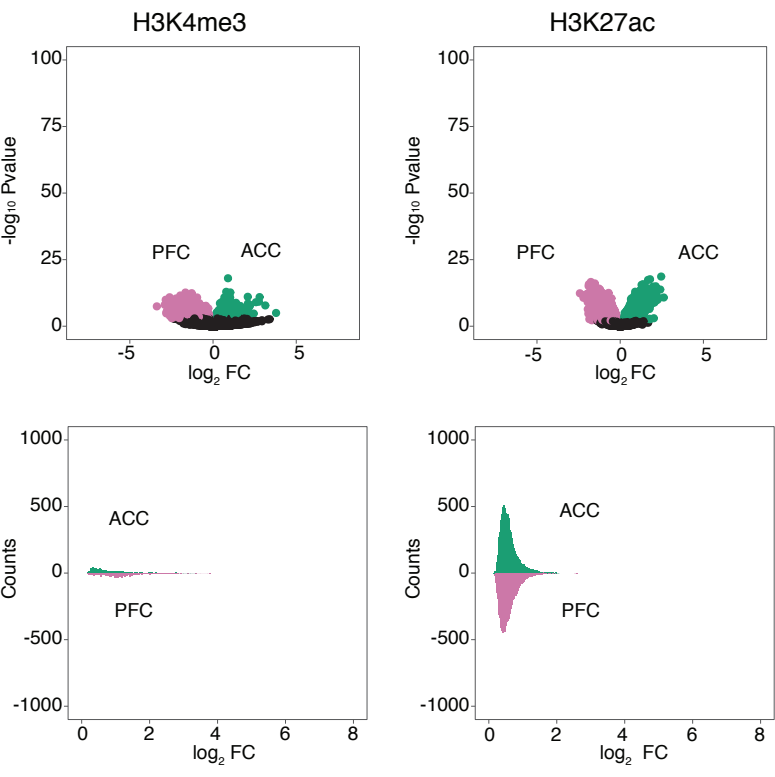

Figure S15

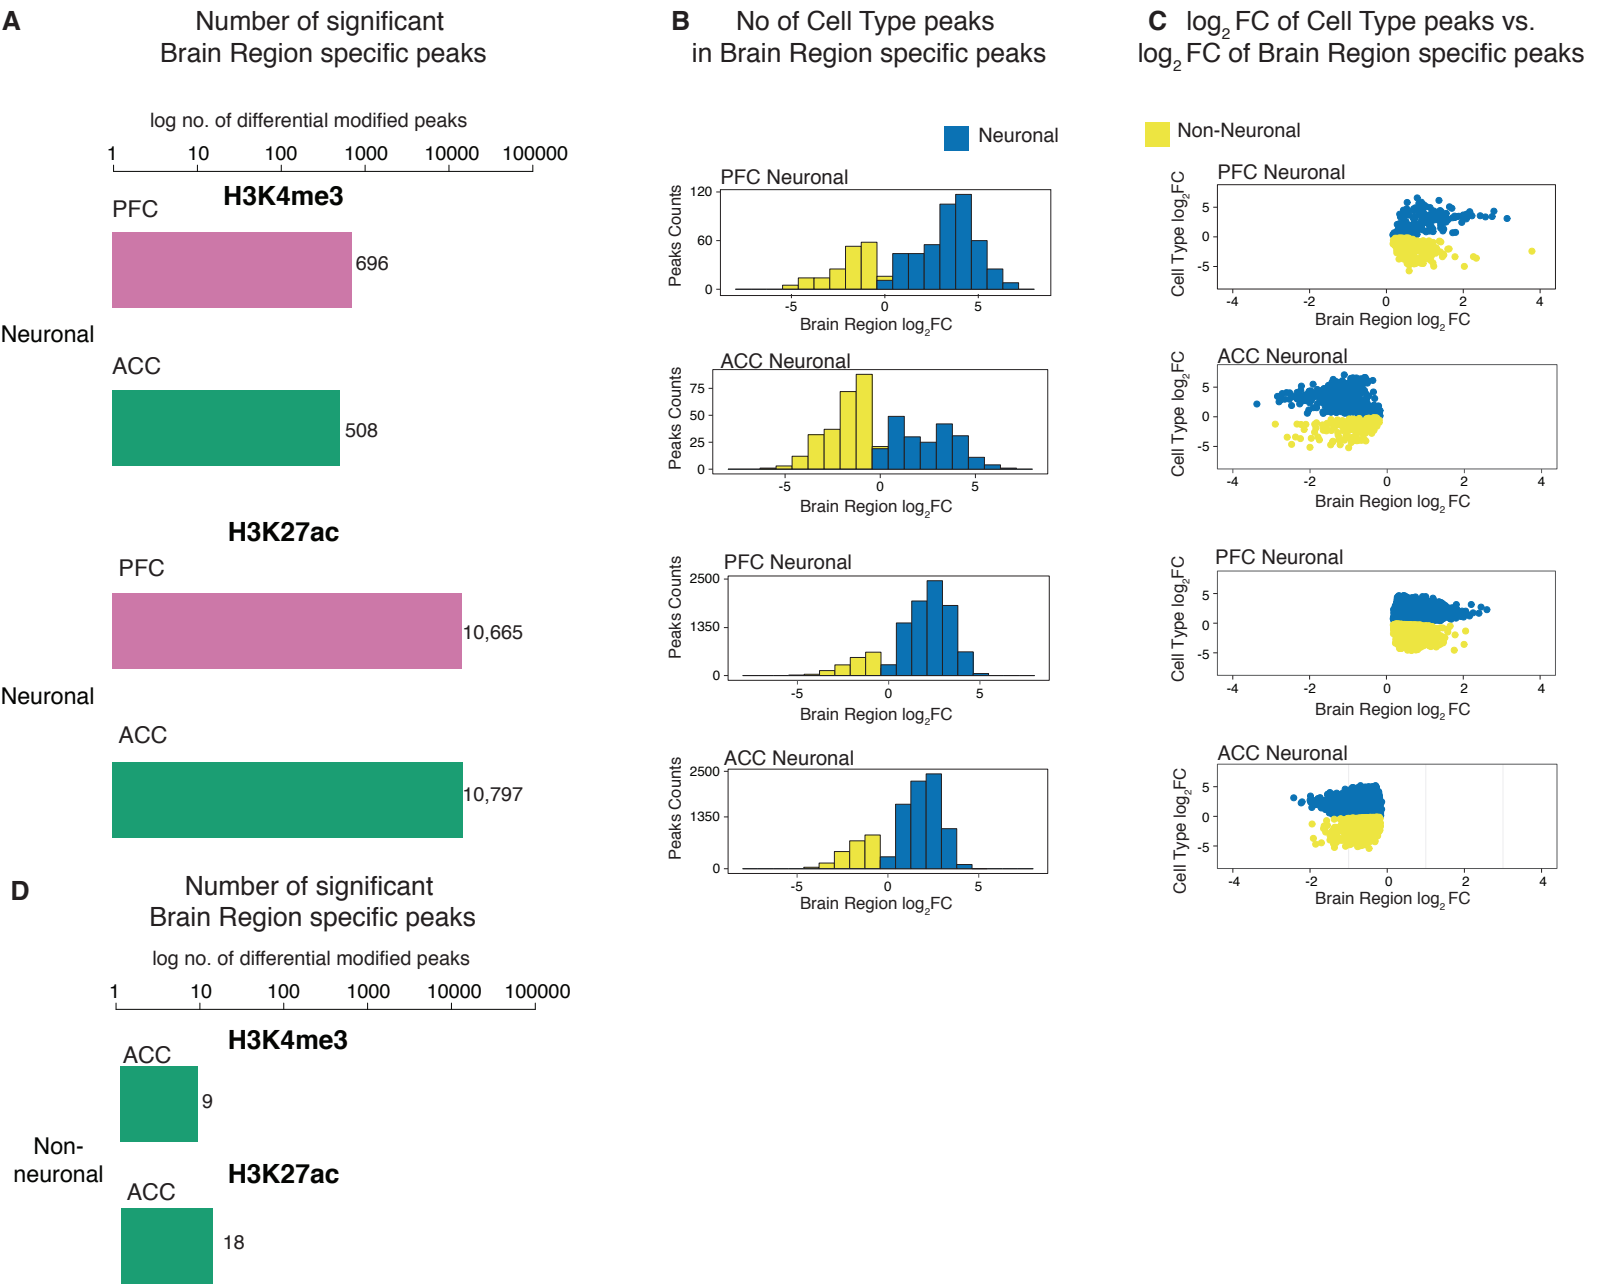

# Figure S16

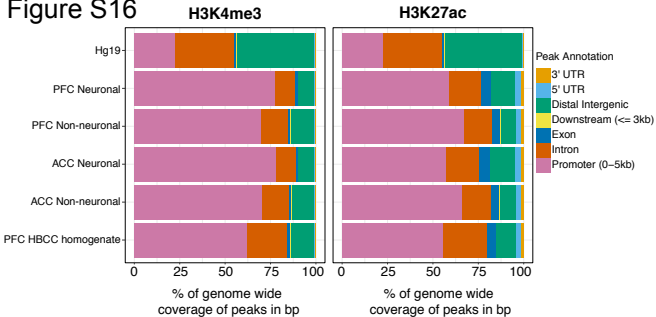

**A****H3K4me3**

Figure S17

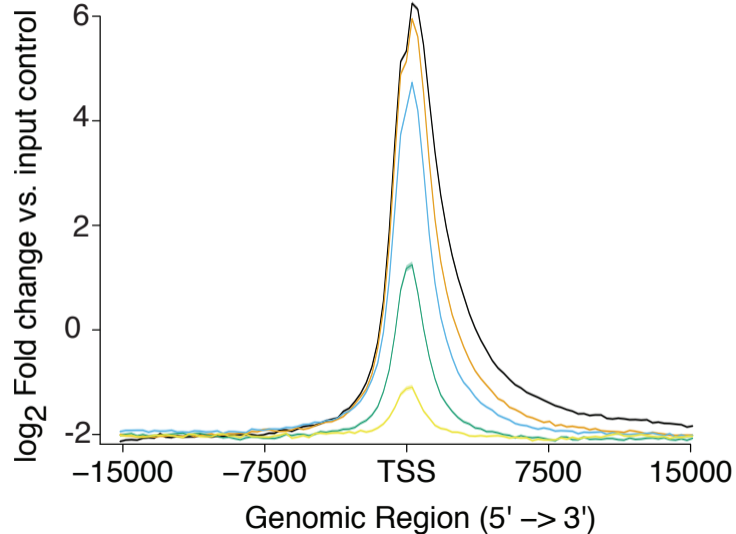**B****H3K27ac**CommonMind gene  
expression quintile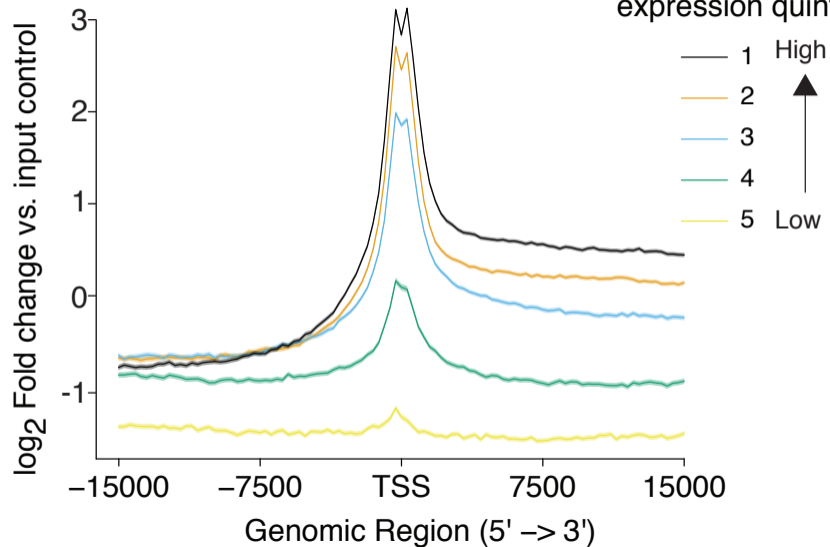

H3K4me3

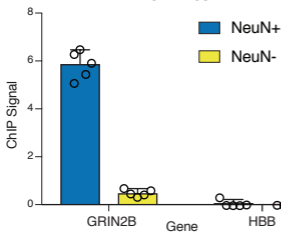

H3K27ac

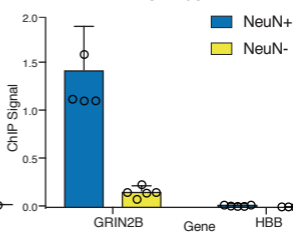

GRIN2B

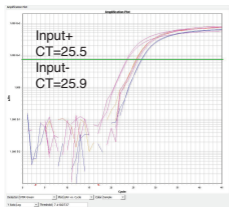

NeuN+  
CT=24.0  
NeuN-  
CT=27.6

GRIN2B

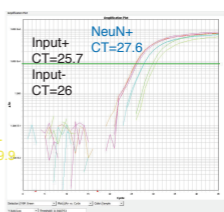

NeuN+  
CT=27.6  
NeuN-  
CT=29.9

HBB

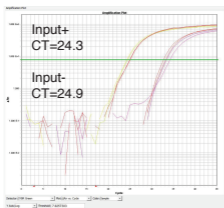

NeuN+  
CT=32.9  
NeuN-  
CT=33.7

HBB

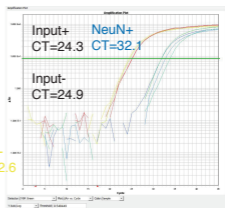

NeuN+  
CT=32.1  
NeuN-  
CT=32.6

H3K27ac\_NeuN+  
H3K27ac\_NeuN-  
H3K4me3\_NeuN+  
H3K4me3\_NeuN-

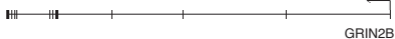

H3K27ac\_NeuN+  
H3K27ac\_NeuN-  
H3K4me3\_NeuN+  
H3K4me3\_NeuN-

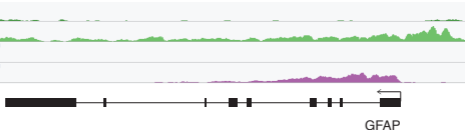

H3K27ac\_NeuN+  
H3K27ac\_NeuN-  
H3K4me3\_NeuN+  
H3K4me3\_NeuN-

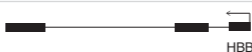



Figure S19

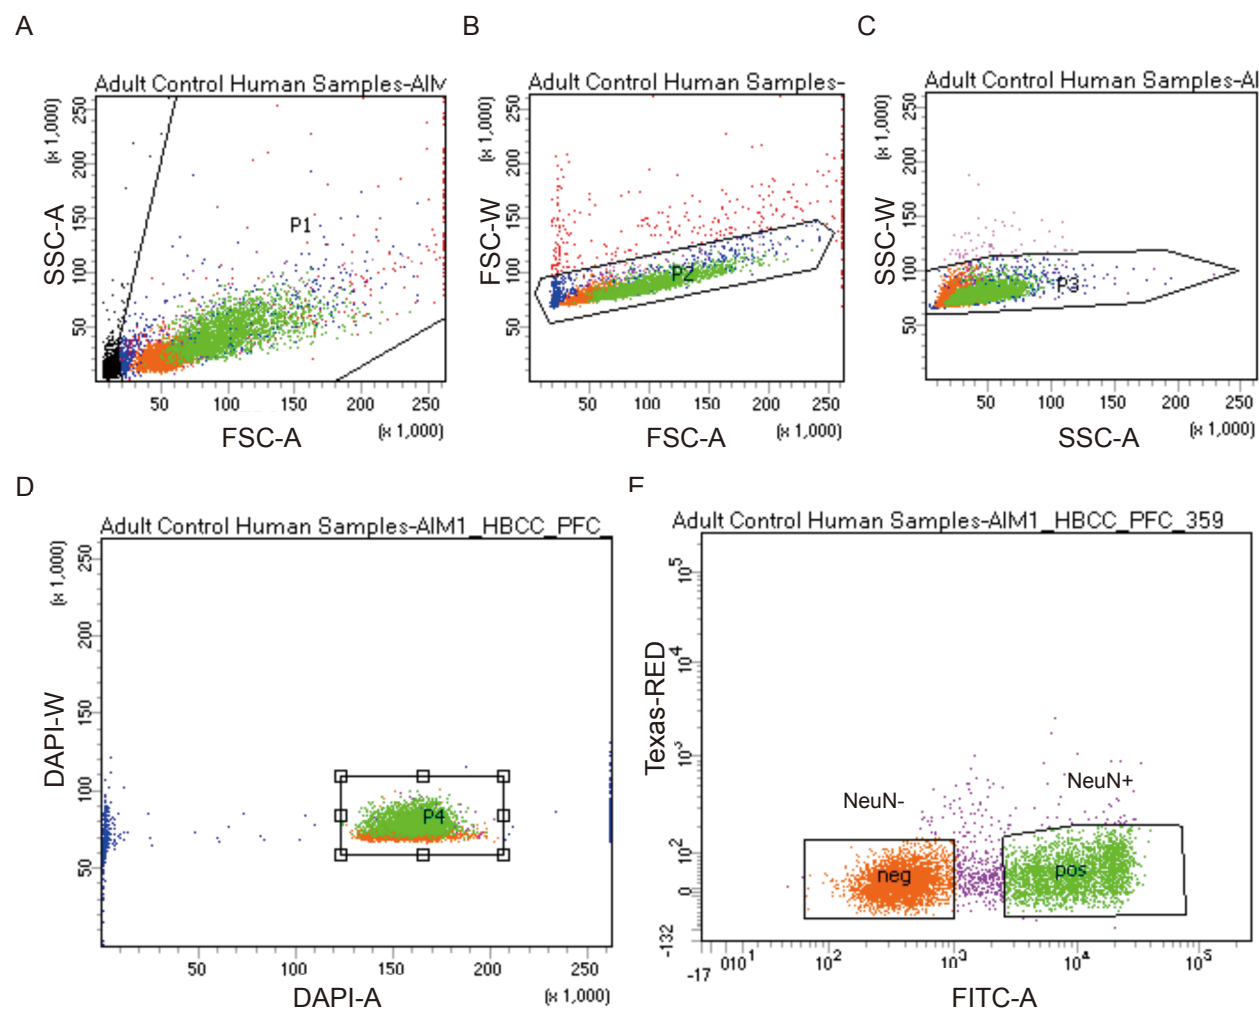

Supplement: NIHMS970888-supplement-1.pdf [file NIHMS970888-supplement-1.pdf]
